# Supplementary material for: Monocytes of patients with familial hypercholesterolemia show alterations in cholesterol metabolism
Source: PubMed Central journal article supplement (PMC2633353; doi:10.1186/1755-8794-1-60), 2008-11-28

A

| Array Index | Array Name            |
|-------------|-----------------------|
| 1           | Control 1.CEL         |
| 2           | Control 10.CEL        |
| 3           | Control 11.CEL        |
| 4           | Control 12.CEL        |
| 5           | Control 13.CEL        |
| 6           | Control 14.CEL        |
| 7           | Control 15.CEL        |
| 8           | Control 2.CEL         |
| 9           | Control 3.CEL         |
| 10          | Control 4.CEL         |
| 11          | Control 5.CEL         |
| 12          | Control 6.CEL         |
| 13          | Control 7.CEL         |
| 14          | Control 8.CEL         |
| 15          | Control 9.CEL         |
| 16          | FH heterozygous 1.CEL |
| 17          | FH heterozygous 2.CEL |
| 18          | FH heterozygous 3.CEL |
| 19          | FH heterozygous 4.CEL |
| 20          | FH heterozygous 5.CEL |
| 21          | FH heterozygous 6.CEL |
| 22          | FH homozygous 1.CEL   |
| 23          | FH homozygous 2.CEL   |
| 24          | FH homozygous 3.CEL   |
| 25          | FH homozygous 4.CEL   |

B

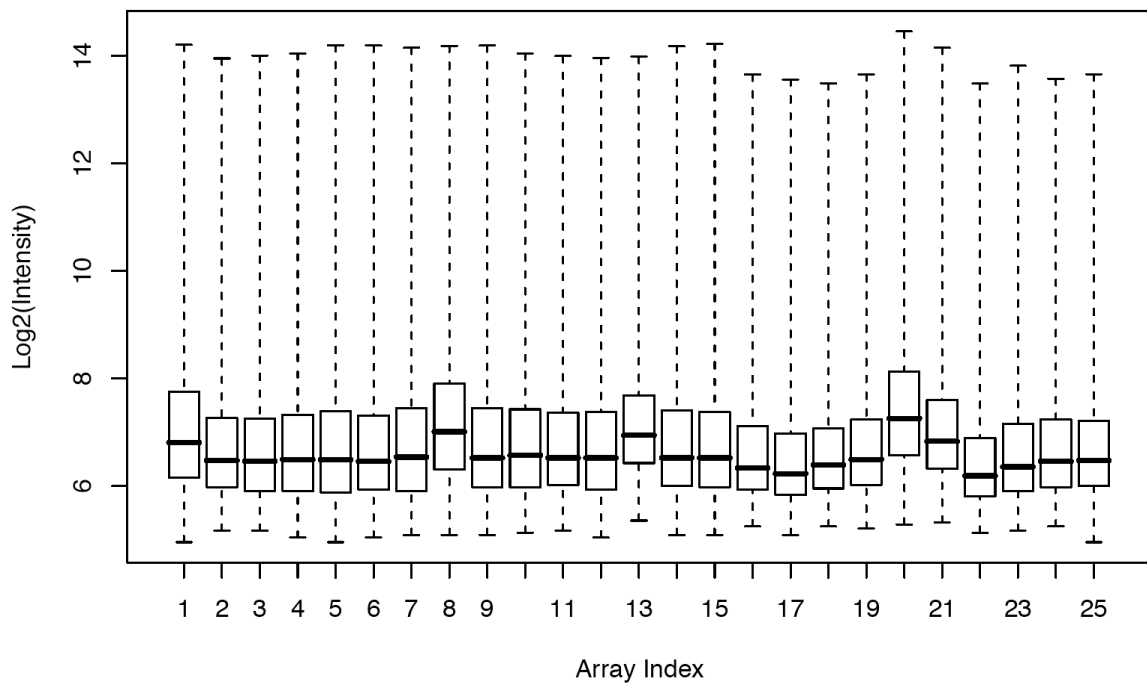

c

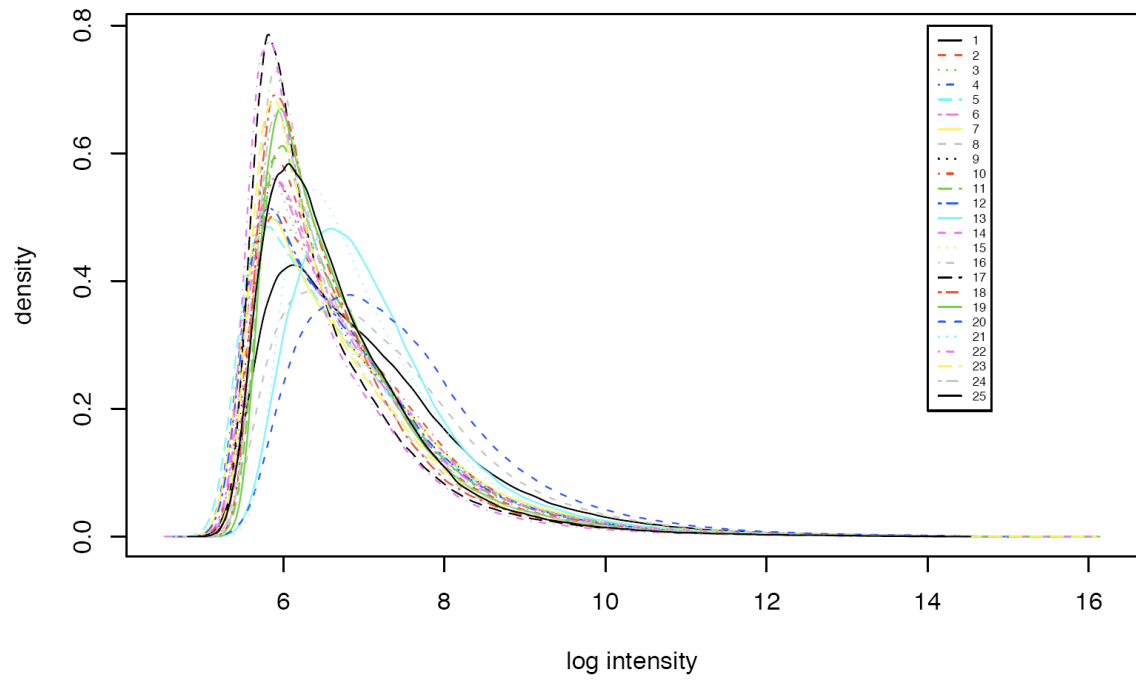

D

- △ actin3/actin5
- gapdh3/gapdh5

QC Stats

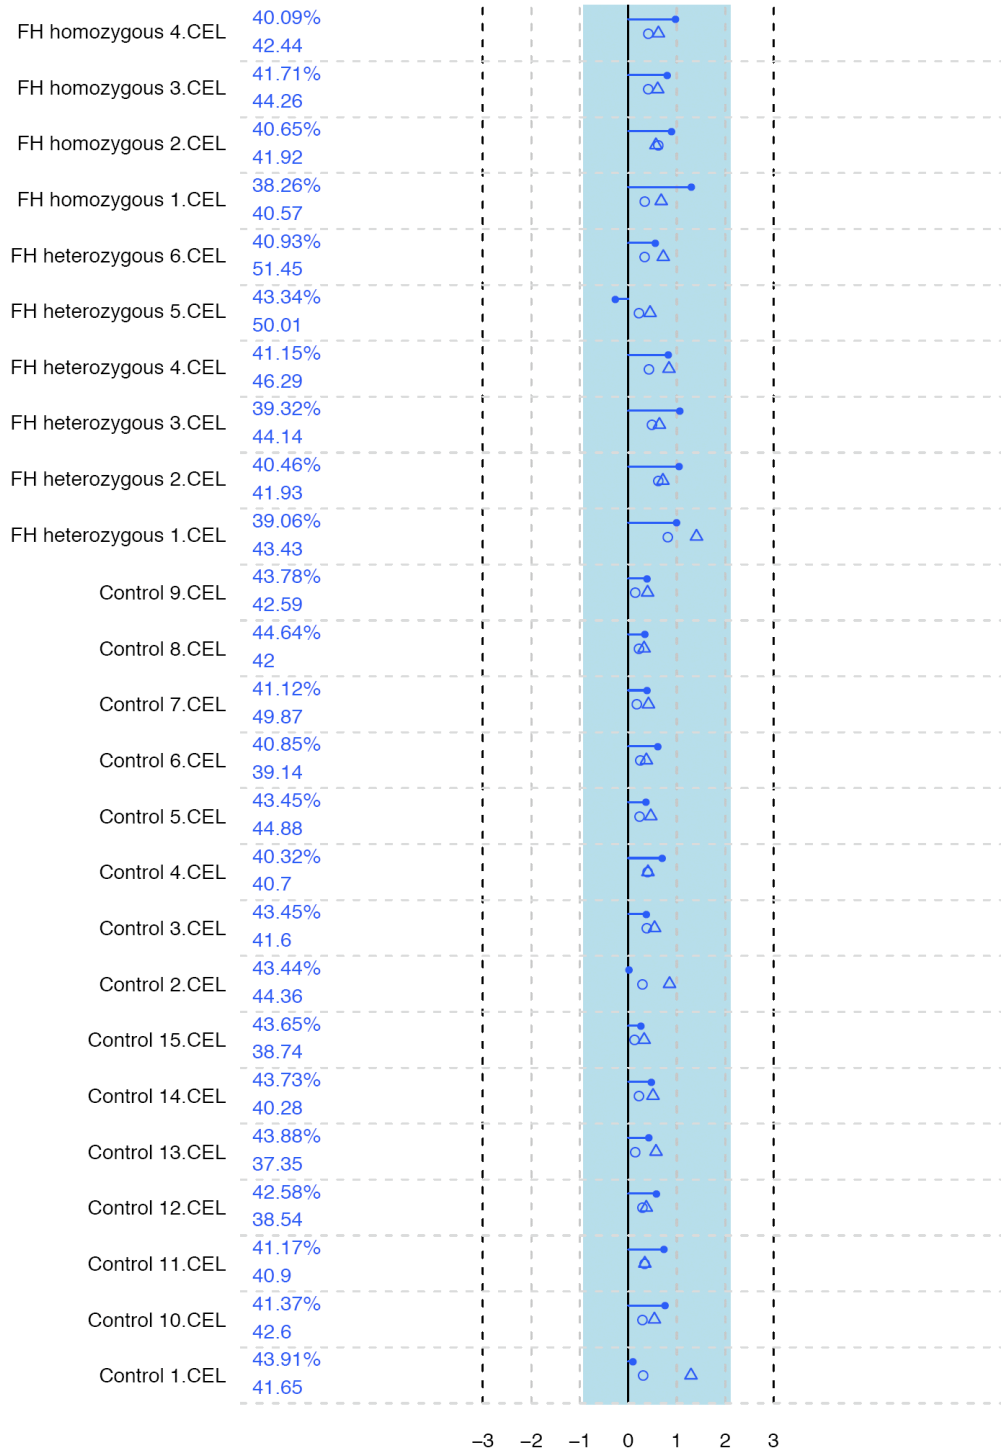

Supplement: 1755-8794-1-60-S2.pdf [file 1755-8794-1-60-S2.pdf]
