# Supplementary material for: Monocytes of patients with familial hypercholesterolemia show alterations in cholesterol metabolism
Source: PubMed Central journal article supplement (PMC2633353; doi:10.1186/1755-8794-1-60), 2008-11-28

A

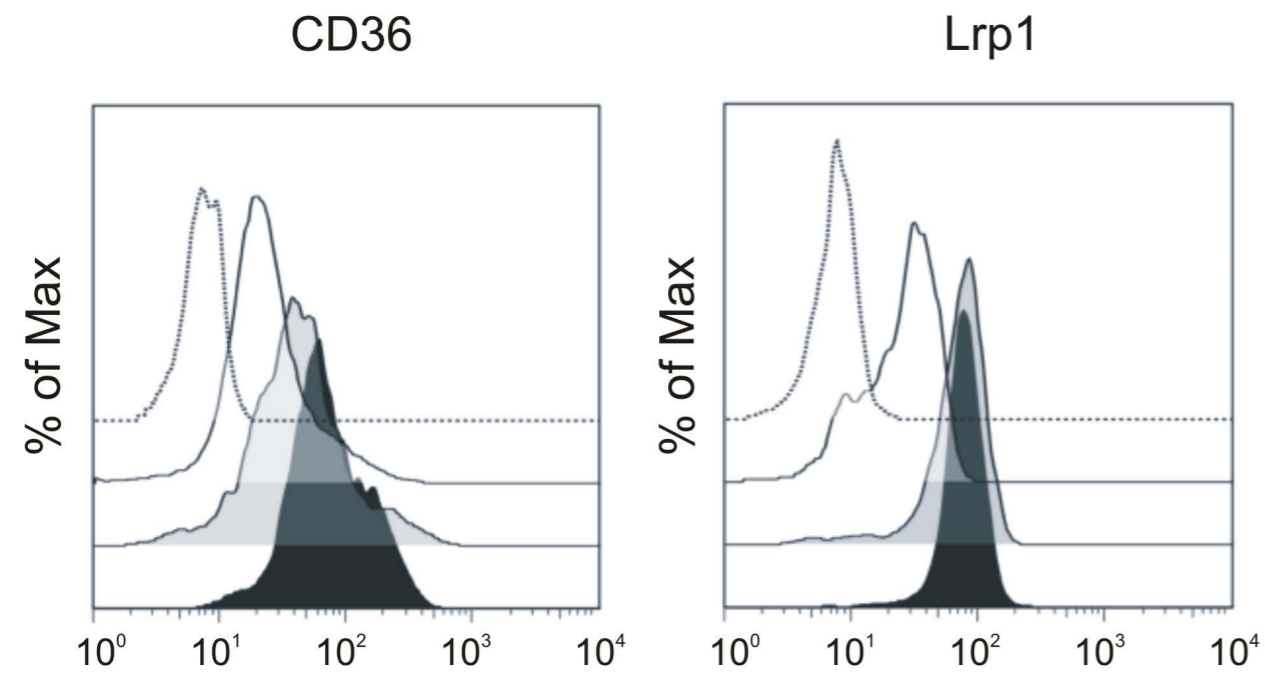

B

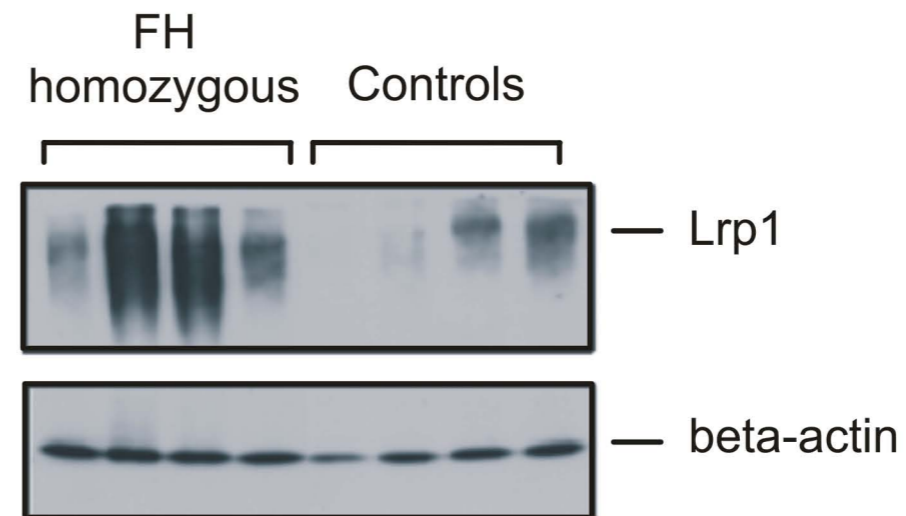

C

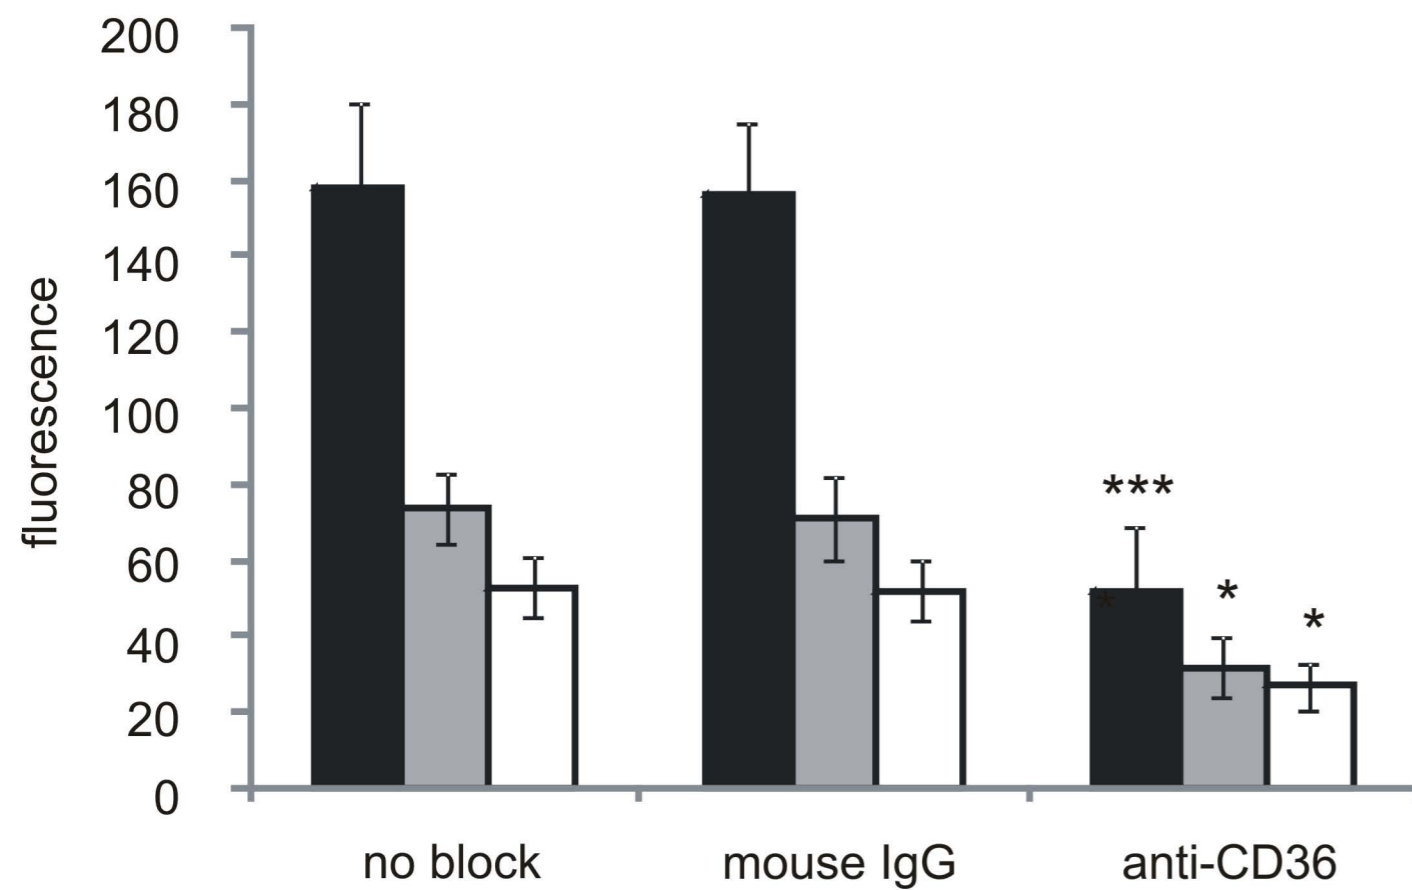

D

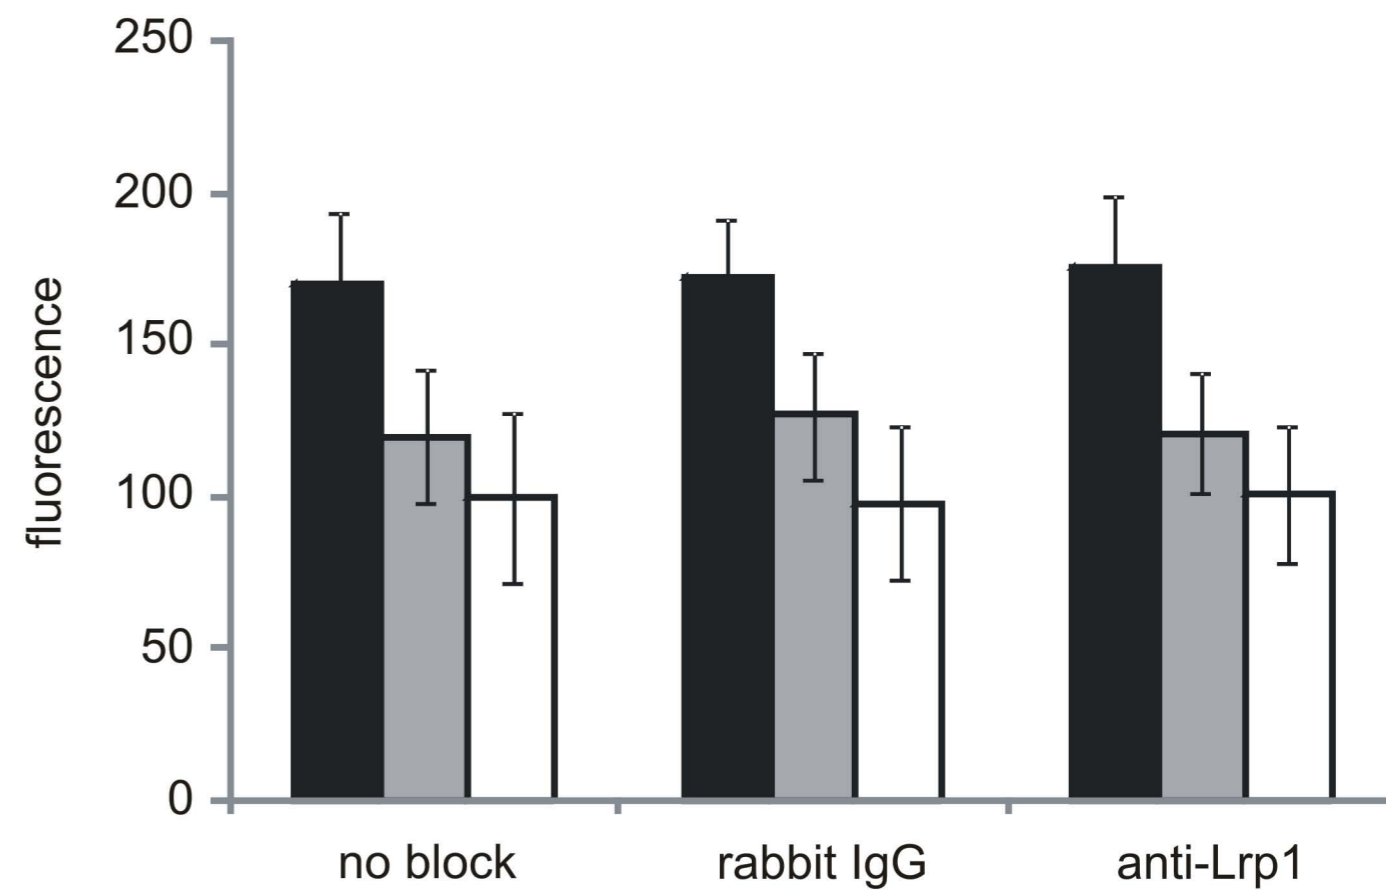

Supplement: 1755-8794-1-60-S4.pdf [file 1755-8794-1-60-S4.pdf]
